# Supplementary material
Source: PubMed Central journal article supplement (PMC11176002)
Supplement: NIHMS1990811-supplement-Supplemental_Material.pdf [file NIHMS1990811-supplement-Supplemental_Material.pdf]

# **Replication of a neuroimaging biomarker for striatal dysfunction in schizophrenia**

**Supplementary Information**

Table S1. Sample characteristics

| HCP psychosis dataset (n=152) |                       |                  | ZHH treatment response cohort (n=97) |                         |
|-------------------------------|-----------------------|------------------|--------------------------------------|-------------------------|
|                               | Early phase psychosis | Healthy controls |                                      | First episode psychosis |
| N                             | n= 101                | n= 51            |                                      | n= 97                   |
| Female (n,%)                  | n=38, (37.62%)        | n=19, (37.25%)   | Female (n,%)                         | n=44, (45.36%)          |
| Age (mean,sd)                 | 22.49, (3.54)         | 24.83, (4.23)    | Age (mean,sd)                        | 24.3, (5.9)             |
| White (n,%)                   | n=52, (51.49%)        | n=37, (72.55%)   | White (n,%)                          | n=32, (32.99%)          |

Table S2. Effect sizes of differences between patients and controls in FSA and intrinsic connectivity values of canonical networks

| Connectivity measure      | Phase encoding and GSR | Cohens d | lower bound 95%CI | upper bound 95%CI |
|---------------------------|------------------------|----------|-------------------|-------------------|
| FSA                       | AP GSR                 | 0.88     | 0.53              | 1.23              |
| FSA                       | AP No GSR              | 0.86     | 0.51              | 1.21              |
| FSA                       | PA GSR                 | 0.91     | 0.56              | 1.26              |
| FSA                       | PA No GSR              | 0.80     | 0.45              | 1.15              |
| Cognitive control network | AP GSR                 | 0.01     | -0.32             | 0.35              |
| Cognitive control network | AP No GSR              | 0.24     | -0.10             | 0.58              |
| Cognitive control network | PA GSR                 | 0.11     | -0.22             | 0.45              |
| Cognitive control network | PA No GSR              | 0.25     | -0.09             | 0.58              |
| Default mode network      | AP GSR                 | -0.25    | -0.59             | 0.09              |
| Default mode network      | AP No GSR              | 0.35     | 0.01              | 0.68              |
| Default mode network      | PA GSR                 | -0.19    | -0.52             | 0.15              |
| Default mode network      | PA No GSR              | 0.10     | -0.23             | 0.44              |
| Dorsal attention network  | AP GSR                 | -0.52    | -0.86             | -0.18             |
| Dorsal attention network  | AP No GSR              | 0.06     | -0.28             | 0.39              |
| Dorsal attention network  | PA GSR                 | -0.48    | -0.82             | -0.14             |
| Dorsal attention network  | PA No GSR              | -0.01    | -0.34             | 0.33              |
| Saliience network         | AP GSR                 | -0.28    | -0.62             | 0.06              |
| Saliience network         | AP No GSR              | -0.05    | -0.39             | 0.29              |
| Saliience network         | PA GSR                 | -0.11    | -0.45             | 0.23              |
| Saliience network         | PA No GSR              | 0.25     | -0.09             | 0.59              |
| Somatosensory network     | AP GSR                 | 0.03     | -0.31             | 0.37              |
| Somatosensory network     | AP No GSR              | 0.28     | -0.06             | 0.62              |
| Somatosensory network     | PA GSR                 | 0.16     | -0.18             | 0.49              |
| Somatosensory network     | PA No GSR              | 0.41     | 0.07              | 0.75              |
| Visual network            | AP GSR                 | 0.03     | -0.31             | 0.36              |

|                |           |      |       |      |
|----------------|-----------|------|-------|------|
| Visual network | AP No GSR | 0.18 | -0.16 | 0.52 |
| Visual network | PA GSR    | 0.12 | -0.22 | 0.45 |
| Visual network | PA No GSR | 0.22 | -0.11 | 0.56 |

Table S3. Effect of potential confounders on FSA (p Values)

| Measure       | p Value Age | p Value Sex | p Value Race | p Value mean FD | p Value Age*Group | p Value Sex*Group | p Value Race*Group | p Value mean FD*Group | p Value PANSS Total (SZ only) | p Value CPZ eq (SZ only) | p Value PANSS Negative (SZ only) |
|---------------|-------------|-------------|--------------|-----------------|-------------------|-------------------|--------------------|-----------------------|-------------------------------|--------------------------|----------------------------------|
| FSA PA GSR    | 0.72        | 0.69        | 0.07         | 0.88            | 0.13              | 0.49              | 0.23               | 0.26                  | 0.17                          | 0.29                     | 0.42                             |
| FSA PA No GSR | 0.44        | 0.09        | 0.01         | 0.49            | 0.18              | 0.83              | 0.13               | 0.44                  | 0.12                          | 0.09                     | 0.20                             |
| FSA AP GSR    | 0.97        | 0.86        | 0.74         | 0.72            | 0.66              | 0.25              | 0.50               | 0.90                  | 0.30                          | 0.11                     | 0.04*                            |
| FSA AP No GSR | 0.64        | 0.73        | 0.85         | 0.19            | 0.44              | 0.40              | 0.81               | 0.35                  | 0.30                          | 0.22                     | 0.05                             |

\*no longer significant after multiple comparisons correction. CPZ eq: Chlorpromazine equivalents. FD: Framework Displacement. SZ: Schizophrenia

Table S4. Predictive performance of the FSA discriminating individuals with psychosis from healthy controls

| <b>Entire cohort</b>                         |             |             |                               |      |                   |                   |
|----------------------------------------------|-------------|-------------|-------------------------------|------|-------------------|-------------------|
| FSA measure                                  | Sensitivity | Specificity | Optimal discrimination cutoff | AUC  | Lower bound 95%CI | Upper bound 95%CI |
| FSA AP GSR                                   | 0.76        | 0.66        | -1.04                         | 0.74 | 0.65              | 0.81              |
| FSA AP No GSR                                | 0.65        | 0.75        | -0.45                         | 0.73 | 0.64              | 0.81              |
| FSA PA GSR                                   | 0.82        | 0.65        | -1.06                         | 0.75 | 0.67              | 0.83              |
| FSA PA No GSR                                | 0.78        | 0.65        | -0.73                         | 0.75 | 0.66              | 0.83              |
| <b>Non-affective psychosis as cases only</b> |             |             |                               |      |                   |                   |
| FSA measure                                  | Sensitivity | Specificity | Optimal discrimination cutoff | AUC  | Lower bound 95%CI | Upper bound 95%CI |
| FSA AP GSR                                   | 0.76        | 0.73        | -1.04                         | 0.76 | 0.68              | 0.85              |
| FSA AP No GSR                                | 0.65        | 0.77        | -0.45                         | 0.74 | 0.65              | 0.82              |
| FSA PA GSR                                   | 0.82        | 0.73        | -1.06                         | 0.80 | 0.72              | 0.88              |
| FSA PA No GSR                                | 0.80        | 0.72        | -0.74                         | 0.78 | 0.69              | 0.86              |
| <b>Affective psychosis as cases only</b>     |             |             |                               |      |                   |                   |
| FSA measure                                  | Sensitivity | Specificity | Optimal discrimination cutoff | AUC  | Lower bound 95%CI | Upper bound 95%CI |
| FSA AP GSR                                   | 0.86        | 0.39        | -1.37                         | 0.65 | 0.52              | 0.78              |
| FSA AP No GSR                                | 0.43        | 0.96        | -0.08                         | 0.70 | 0.57              | 0.82              |

|                  |      |      |       |      |      |      |
|------------------|------|------|-------|------|------|------|
| FSA PA GSR       | 0.82 | 0.39 | -1.06 | 0.59 | 0.45 | 0.73 |
| FSA PA No<br>GSR | 0.55 | 0.70 | -0.52 | 0.63 | 0.49 | 0.76 |

Table S5. Predictive performance of the FSA discriminating in individuals with psychosis between response and non-response to a prospective trial of antipsychotic drugs

| <b>Entire cohort</b>                |             |             |                               |      |                   |                   |
|-------------------------------------|-------------|-------------|-------------------------------|------|-------------------|-------------------|
| FSA measure                         | Sensitivity | Specificity | Optimal discrimination cutoff | AUC  | Lower bound 95%CI | Upper bound 95%CI |
| FSA AP GSR                          | 0.72        | 0.41        | -1.47                         | 0.49 | 0.34              | 0.66              |
| FSA AP No GSR                       | 0.72        | 0.35        | -0.98                         | 0.52 | 0.36              | 0.68              |
| FSA PA GSR                          | 0.35        | 0.88        | -0.54                         | 0.56 | 0.40              | 0.71              |
| FSA PA No GSR                       | 0.35        | 0.88        | -0.02                         | 0.53 | 0.38              | 0.69              |
| <b>Non-affective psychosis only</b> |             |             |                               |      |                   |                   |
| FSA measure                         | Sensitivity | Specificity | Optimal discrimination cutoff | AUC  | Lower bound 95%CI | Upper bound 95%CI |
| FSA AP GSR                          | 0.67        | 0.50        | -1.47                         | 0.52 | 0.34              | 0.70              |
| FSA AP No GSR                       | 0.42        | 0.71        | -0.64                         | 0.50 | 0.32              | 0.67              |
| FSA PA GSR                          | 0.31        | 0.93        | -0.54                         | 0.56 | 0.39              | 0.71              |
| FSA PA No GSR                       | 0.31        | 0.93        | -0.02                         | 0.48 | 0.33              | 0.64              |



Figure S1. Receiver operating characteristic curves for prediction of treatment response by FSA score at baseline

### Classification of treatment response by FSA score

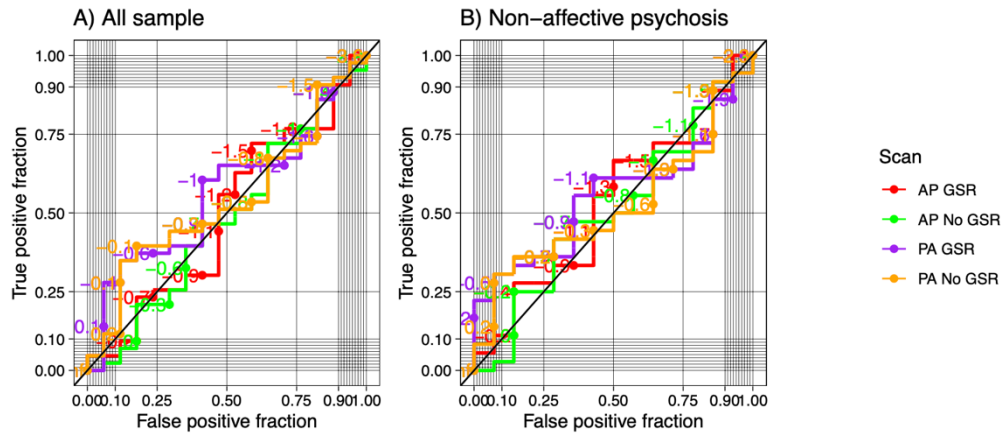

Table S6. Intraclass correlation coefficients of test-retest reliability of FSA and network intrinsic connectivity

| <b>Biomarker</b>          | <b>GSR_phase</b> | <b>Participant type</b> | <b>ICC</b> | <b>lower bound 95%CI</b> | <b>upper bound 95%CI</b> |
|---------------------------|------------------|-------------------------|------------|--------------------------|--------------------------|
| FSA                       | AP GSR           | Entire sample           | 0.42       | 0.28                     | 0.55                     |
| FSA                       | AP GSR           | Control                 | 0.24       | -0.04                    | 0.48                     |
| FSA                       | AP GSR           | Patient                 | 0.42       | 0.24                     | 0.57                     |
| FSA                       | AP NoGSR         | Entire sample           | 0.48       | 0.35                     | 0.60                     |
| FSA                       | AP NoGSR         | Control                 | 0.46       | 0.21                     | 0.65                     |
| FSA                       | AP NoGSR         | Patient                 | 0.41       | 0.23                     | 0.56                     |
| FSA                       | PA GSR           | Entire sample           | 0.28       | 0.13                     | 0.42                     |
| FSA                       | PA GSR           | Control                 | 0.20       | -0.08                    | 0.45                     |
| FSA                       | PA GSR           | Patient                 | 0.20       | 0.01                     | 0.38                     |
| FSA                       | PA NoGSR         | Entire sample           | 0.22       | 0.06                     | 0.37                     |
| FSA                       | PA NoGSR         | Control                 | 0.28       | 0.00                     | 0.51                     |
| FSA                       | PA NoGSR         | Patient                 | 0.10       | -0.10                    | 0.29                     |
| Cognitive control network | AP GSR           | Entire sample           | 0.50       | 0.37                     | 0.61                     |
| Cognitive control network | AP GSR           | Control                 | 0.47       | 0.23                     | 0.66                     |
| Cognitive control network | AP GSR           | Patient                 | 0.53       | 0.37                     | 0.65                     |
| Cognitive control network | AP NoGSR         | Entire sample           | 0.37       | 0.22                     | 0.50                     |
| Cognitive control network | AP NoGSR         | Control                 | 0.34       | 0.07                     | 0.56                     |
| Cognitive control network | AP NoGSR         | Patient                 | 0.39       | 0.21                     | 0.54                     |
| Cognitive control network | PA GSR           | Entire sample           | 0.35       | 0.21                     | 0.48                     |
| Cognitive control network | PA GSR           | Control                 | 0.25       | -0.03                    | 0.49                     |
| Cognitive control network | PA GSR           | Patient                 | 0.40       | 0.22                     | 0.55                     |
| Cognitive control network | PA NoGSR         | Entire sample           | 0.30       | 0.15                     | 0.44                     |
| Cognitive control network | PA NoGSR         | Control                 | 0.23       | -0.05                    | 0.47                     |

|                           |          |               |      |       |      |
|---------------------------|----------|---------------|------|-------|------|
| Cognitive control network | PA NoGSR | Patient       | 0.35 | 0.16  | 0.51 |
| Default mode network      | AP GSR   | Entire sample | 0.34 | 0.19  | 0.47 |
| Default mode network      | AP GSR   | Control       | 0.36 | 0.09  | 0.57 |
| Default mode network      | AP GSR   | Patient       | 0.32 | 0.14  | 0.49 |
| Default mode network      | AP NoGSR | Entire sample | 0.25 | 0.10  | 0.40 |
| Default mode network      | AP NoGSR | Control       | 0.14 | -0.13 | 0.40 |
| Default mode network      | AP NoGSR | Patient       | 0.30 | 0.11  | 0.46 |
| Default mode network      | PA GSR   | Entire sample | 0.35 | 0.20  | 0.48 |
| Default mode network      | PA GSR   | Control       | 0.11 | -0.17 | 0.37 |
| Default mode network      | PA GSR   | Patient       | 0.45 | 0.28  | 0.59 |
| Default mode network      | PA NoGSR | Entire sample | 0.27 | 0.11  | 0.41 |
| Default mode network      | PA NoGSR | Control       | 0.13 | -0.15 | 0.39 |
| Default mode network      | PA NoGSR | Patient       | 0.32 | 0.13  | 0.48 |
| Dorsal attention network  | AP GSR   | Entire sample | 0.46 | 0.33  | 0.58 |
| Dorsal attention network  | AP GSR   | Control       | 0.35 | 0.08  | 0.57 |
| Dorsal attention network  | AP GSR   | Patient       | 0.48 | 0.31  | 0.61 |
| Dorsal attention network  | AP NoGSR | Entire sample | 0.30 | 0.15  | 0.44 |
| Dorsal attention network  | AP NoGSR | Control       | 0.26 | -0.01 | 0.50 |
| Dorsal attention network  | AP NoGSR | Patient       | 0.33 | 0.15  | 0.50 |
| Dorsal attention network  | PA GSR   | Entire sample | 0.39 | 0.25  | 0.52 |
| Dorsal attention network  | PA GSR   | Control       | 0.23 | -0.05 | 0.47 |
| Dorsal attention network  | PA GSR   | Patient       | 0.44 | 0.26  | 0.58 |
| Dorsal attention network  | PA NoGSR | Entire sample | 0.26 | 0.11  | 0.41 |
| Dorsal attention network  | PA NoGSR | Control       | 0.23 | -0.05 | 0.47 |
| Dorsal attention network  | PA NoGSR | Patient       | 0.29 | 0.10  | 0.46 |
| Saliience network         | AP GSR   | Entire sample | 0.34 | 0.20  | 0.48 |
| Saliience network         | AP GSR   | Control       | 0.26 | -0.02 | 0.50 |
| Saliience network         | AP GSR   | Patient       | 0.38 | 0.20  | 0.54 |

|                       |          |               |      |       |      |
|-----------------------|----------|---------------|------|-------|------|
| Saliency network      | AP NoGSR | Entire sample | 0.29 | 0.14  | 0.43 |
| Saliency network      | AP NoGSR | Control       | 0.29 | 0.02  | 0.52 |
| Saliency network      | AP NoGSR | Patient       | 0.29 | 0.11  | 0.46 |
| Saliency network      | PA GSR   | Entire sample | 0.30 | 0.15  | 0.44 |
| Saliency network      | PA GSR   | Control       | 0.40 | 0.14  | 0.61 |
| Saliency network      | PA GSR   | Patient       | 0.27 | 0.08  | 0.44 |
| Saliency network      | PA NoGSR | Entire sample | 0.07 | -0.09 | 0.22 |
| Saliency network      | PA NoGSR | Control       | 0.00 | -0.27 | 0.27 |
| Saliency network      | PA NoGSR | Patient       | 0.10 | -0.10 | 0.29 |
| Somatosensory network | AP GSR   | Entire sample | 0.18 | 0.02  | 0.33 |
| Somatosensory network | AP GSR   | Control       | 0.20 | -0.08 | 0.45 |
| Somatosensory network | AP GSR   | Patient       | 0.18 | -0.02 | 0.36 |
| Somatosensory network | AP NoGSR | Entire sample | 0.35 | 0.21  | 0.49 |
| Somatosensory network | AP NoGSR | Control       | 0.16 | -0.12 | 0.42 |
| Somatosensory network | AP NoGSR | Patient       | 0.48 | 0.32  | 0.62 |
| Somatosensory network | PA GSR   | Entire sample | 0.26 | 0.11  | 0.41 |
| Somatosensory network | PA GSR   | Control       | 0.15 | -0.13 | 0.41 |
| Somatosensory network | PA GSR   | Patient       | 0.33 | 0.14  | 0.49 |
| Somatosensory network | PA NoGSR | Entire sample | 0.26 | 0.10  | 0.40 |
| Somatosensory network | PA NoGSR | Control       | 0.17 | -0.10 | 0.43 |
| Somatosensory network | PA NoGSR | Patient       | 0.29 | 0.10  | 0.46 |
| Visual network        | AP GSR   | Entire sample | 0.25 | 0.10  | 0.40 |
| Visual network        | AP GSR   | Control       | 0.20 | -0.08 | 0.45 |
| Visual network        | AP GSR   | Patient       | 0.28 | 0.09  | 0.45 |
| Visual network        | AP NoGSR | Entire sample | 0.22 | 0.06  | 0.36 |
| Visual network        | AP NoGSR | Control       | 0.25 | -0.03 | 0.49 |
| Visual network        | AP NoGSR | Patient       | 0.22 | 0.02  | 0.40 |
| Visual network        | PA GSR   | Entire sample | 0.33 | 0.18  | 0.46 |

|                |          |               |      |       |      |
|----------------|----------|---------------|------|-------|------|
| Visual network | PA GSR   | Control       | 0.25 | -0.02 | 0.49 |
| Visual network | PA GSR   | Patient       | 0.38 | 0.20  | 0.53 |
| Visual network | PA NoGSR | Entire sample | 0.27 | 0.12  | 0.41 |
| Visual network | PA NoGSR | Control       | 0.31 | 0.04  | 0.54 |
| Visual network | PA NoGSR | Patient       | 0.26 | 0.07  | 0.43 |

Table S7. Intraclass correlation coefficients of phase encoding direction reliability (i.e., AP vs PA) of FSA and network intrinsic connectivity

| <b>Biomarker</b>          | <b>Participant type</b> | <b>ICC</b> | <b>lower bound 95%CI</b> | <b>upper bound 95%CI</b> |
|---------------------------|-------------------------|------------|--------------------------|--------------------------|
| FSA                       | Entire sample           | 0.51       | 0.42                     | 0.59                     |
| FSA                       | Patient                 | 0.54       | 0.43                     | 0.63                     |
| FSA                       | Control                 | 0.23       | 0.04                     | 0.40                     |
| Cognitive control network | Entire sample           | 0.83       | 0.79                     | 0.86                     |
| Cognitive control network | Patient                 | 0.84       | 0.80                     | 0.88                     |
| Cognitive control network | Control                 | 0.81       | 0.73                     | 0.86                     |
| Default mode network      | Entire sample           | 0.76       | 0.71                     | 0.80                     |
| Default mode network      | Patient                 | 0.75       | 0.68                     | 0.80                     |
| Default mode network      | Control                 | 0.79       | 0.70                     | 0.85                     |
| Dorsal attention network  | Entire sample           | 0.86       | 0.82                     | 0.88                     |
| Dorsal attention network  | Patient                 | 0.85       | 0.81                     | 0.89                     |
| Dorsal attention network  | Control                 | 0.86       | 0.80                     | 0.91                     |
| Salience network          | Entire sample           | 0.76       | 0.71                     | 0.80                     |
| Salience network          | Patient                 | 0.73       | 0.66                     | 0.79                     |
| Salience network          | Control                 | 0.82       | 0.75                     | 0.88                     |
| Somatosensory network     | Entire sample           | 0.75       | 0.70                     | 0.80                     |
| Somatosensory network     | Patient                 | 0.75       | 0.68                     | 0.80                     |
| Somatosensory network     | Control                 | 0.76       | 0.66                     | 0.83                     |
| Visual network            | Entire sample           | 0.80       | 0.76                     | 0.84                     |
| Visual network            | Patient                 | 0.83       | 0.78                     | 0.87                     |
| Visual network            | Control                 | 0.76       | 0.66                     | 0.83                     |
